# Supplementary material for: MicroRNA-1252-5p, regulated by Myb, inhibits invasion and epithelial-mesenchymal transition of pancreatic cancer cells by targeting NEDD9
Source: publisher site journal article supplement (doi:10.18632/aging.203344), 2021-07-27
Supplement: Supplementary file [file aging-v13i14-203344-supplementary-material-SD3.pdf]

## SUPPLEMENTARY TABLE

**Supplementary Table 1. The sequences of the primers for QRT-PCR.**

|            | <b>Forward premier (5'-3')</b> | <b>Reverse premier (5'-3')</b> |
|------------|--------------------------------|--------------------------------|
| GAPDH      | AGGTGAAGGTCGGAGTCAACG          | GCTCCTGGAAGATGGTGATGG          |
| ZEB1       | TTACACCTTTGCATACAGAACCC        | TTTACGATTACACCCAGACTGC         |
| E-cadherin | CGAGAGCTACACGTTACGG            | GGGTGTCGAGGGAAAAATAGG          |
| Vimentin   | GCCCTAGACGAACTGGGTC            | GGCTGCAACTGCCTAATGAG           |
| N-cadherin | TTTGATGGAGGTCTCCTAACACC        | ACGTTTAACACGTTGGAAATGTG        |
| NEDD9      | GACCGTCATAGAGCAGAACAC          | TGCATGGGACCAATCAGAAGC          |
| Twist      | GTCCGCAGTCTTACGAGGAG           | GCTTGAGGGTCTGAATCTTGCT         |
| Snail      | CTCTAGGCCCTGGCTGCTAC           | GCCTGGCACTGGTACTTCTT           |
| U6         | TGACACGCAAATTCGTGAAGCGTTC      | CCAGTCTCAGGGTCCGAGGTATTC       |
